# Supplementary material
Source: PubMed Central journal article supplement (PMC5704930)
Supplement: NIHMS919371-supplement-1.pdf [file NIHMS919371-supplement-1.pdf]

## **Supplemental Information:**

Figure S1-S4

Table S1-S4

Supplemental Experimental Procedures

Supplemental References

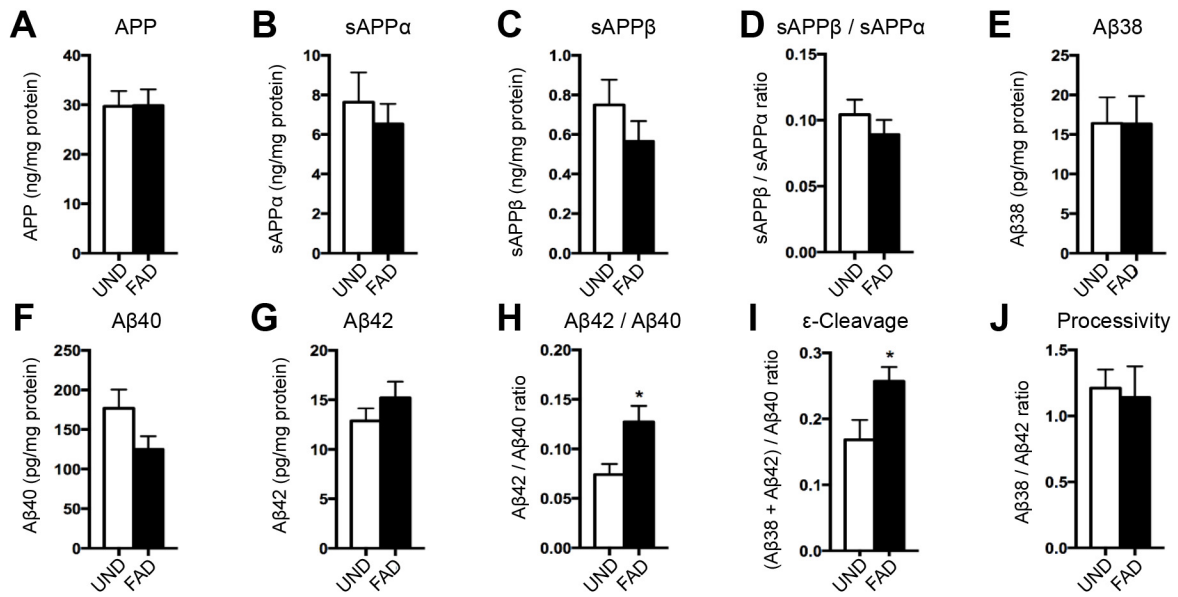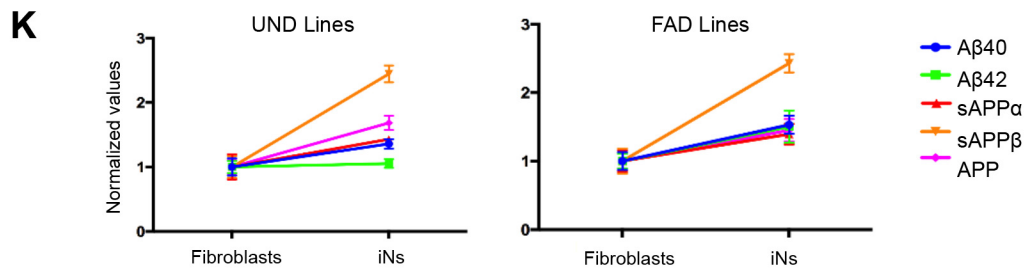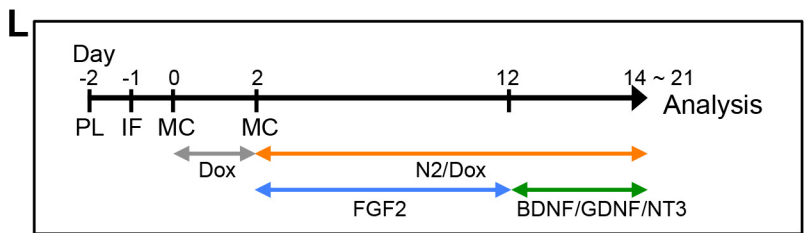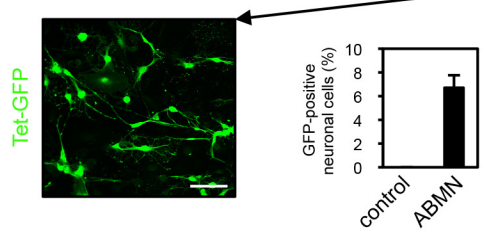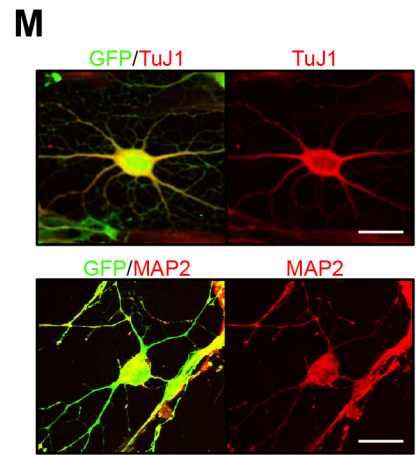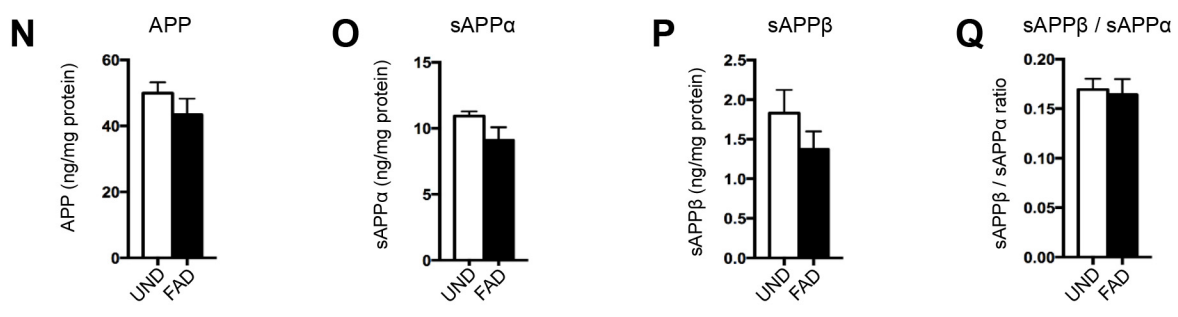

**Figure S1, Related to Figure 1 and 2: APP processing in fibroblasts and hiN cells from FAD patients.**

(A-J) Levels of APP (A), sAPP $\alpha$  (B), sAPP $\beta$  (C), the sAPP $\beta$ /sAPP $\alpha$  ratio (D), A $\beta$ 38 (E), A $\beta$ 40 (F), A $\beta$ 42 (G), the A $\beta$ 42/A $\beta$ 40 ratio (H),  $\epsilon$ -cleavage (I), and processivity (J) are shown. These data represent an independent analysis of fibroblast cultures from patients with FAD PSEN mutations or unaffected controls (UND), presented as further replication of the findings. (K) Comparison of the levels of A $\beta$ 40, A $\beta$ 42, sAPP $\alpha$ , sAPP $\beta$ , and APP between fibroblasts (as presented in Figure S1A, B, C, F, and G) and hiNs (as presented in Figure 2 of UND and FAD lines). n = 3 lines per group. (L) Timeline of hiN direct conversion from fibroblasts. PL, plating; IF, lentiviral infection; MC, medium change; Dox, doxycycline. Representative picture (green) and respective quantification of GFP-positive hiNs (the ratio of GFP-positive neuronal morphology cell per fibroblast plated). Bar, 20  $\mu$ m. (M) Converted hiNs were positive for neuronal markers such as TuJ1 and MAP2. Bars, 10  $\mu$ m. (N-Q) The levels of APP (N), sAPP $\alpha$  (O), sAPP $\beta$  (P), the sAPP $\beta$ /sAPP $\alpha$  ratio (Q) in hiN cells as in Figure 2. Fibroblast lines used in these studies are shown in Table S1.

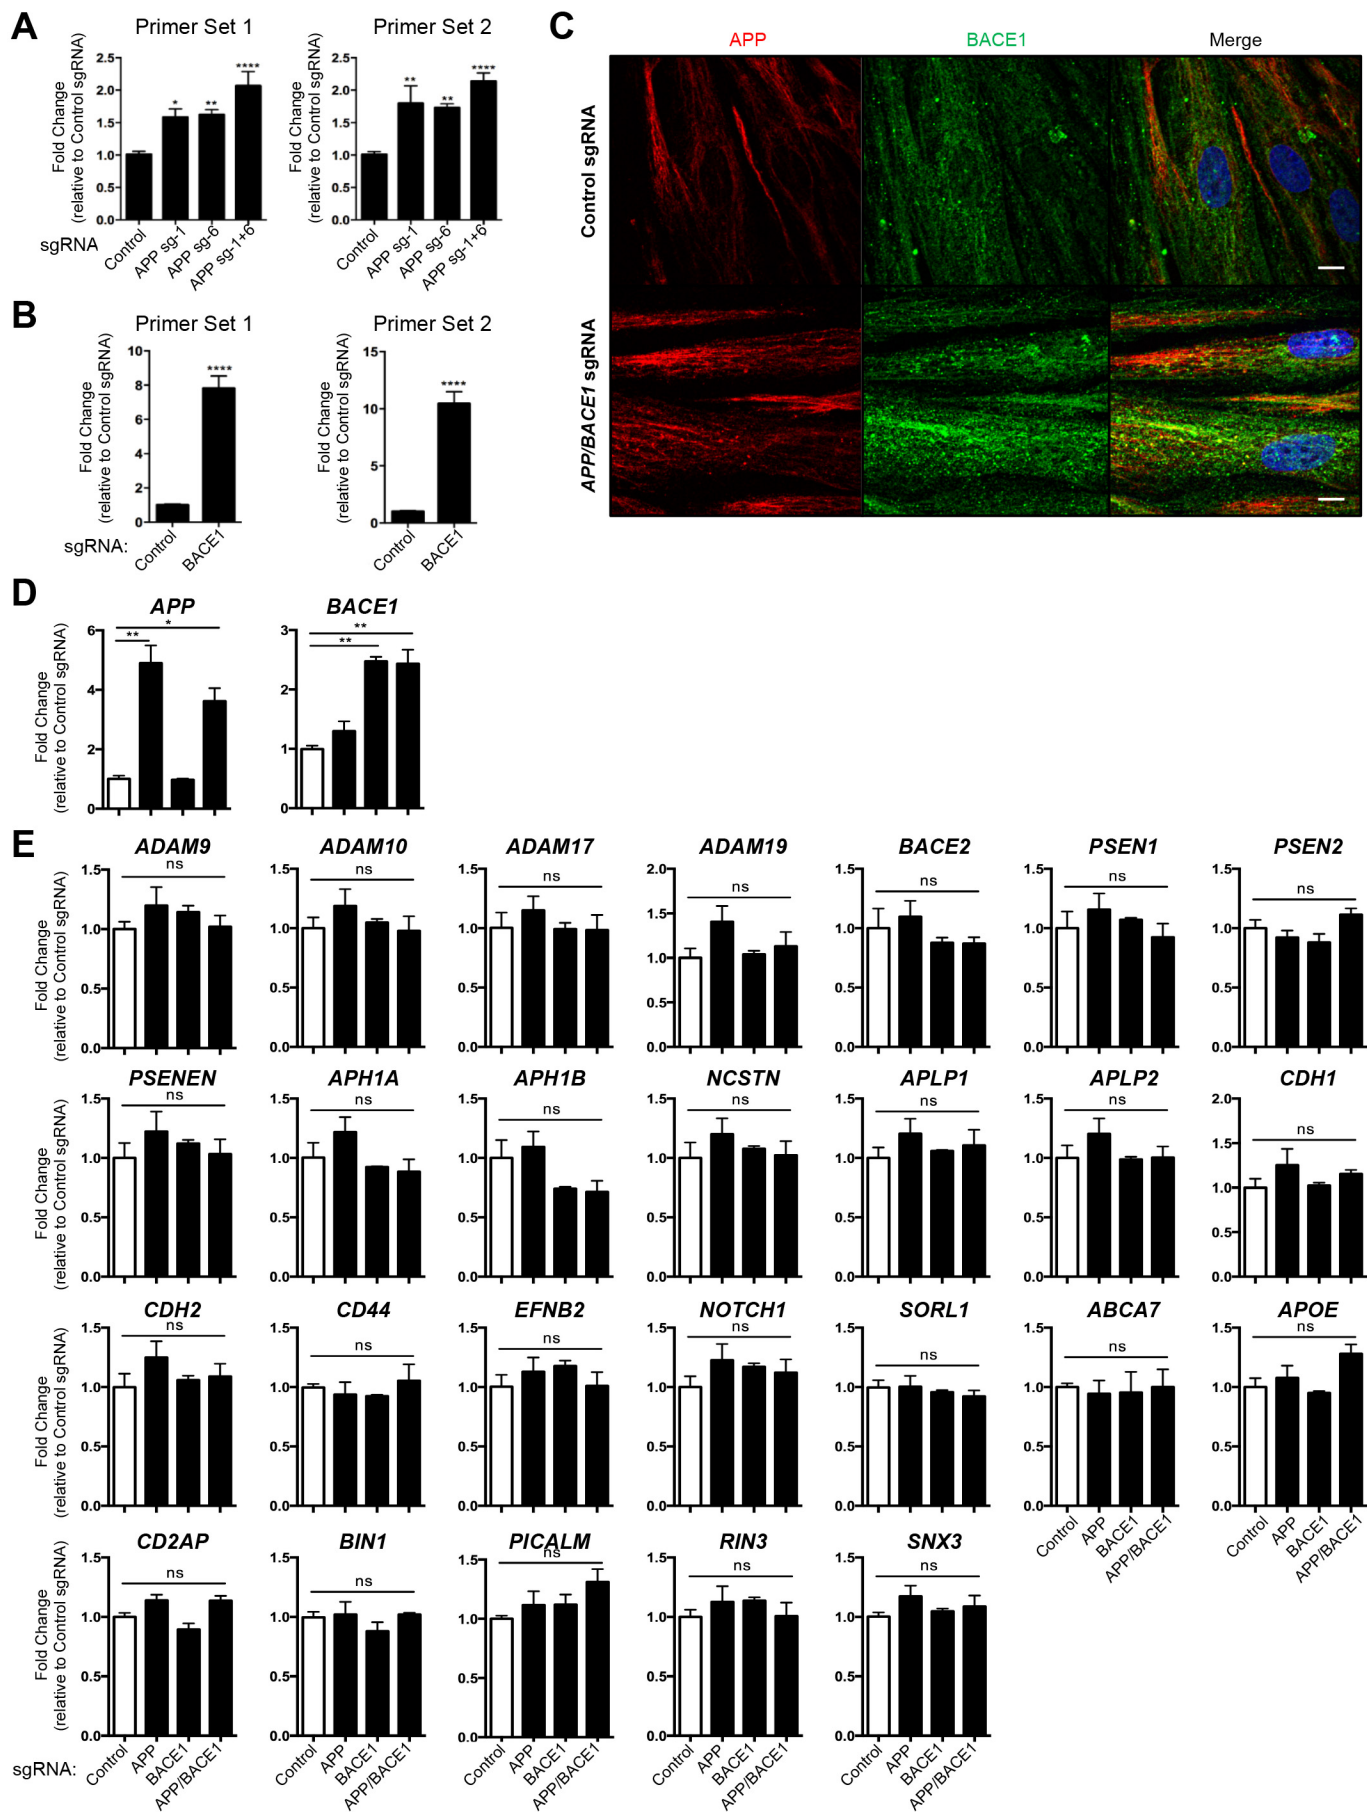



**Figure S2, Related to Figure 3: Characterization of SAM-activated cells.**

**(A)** Additional elevation of endogenous *APP* expression by simultaneous treatment of *APP* sg-1 and sg-6 (sg-1+6), as quantified by qPCR analysis using two different primer sets. **(B)** Elevation of endogenous *BACE1* expression by treatment of *BACE1* sg-3, as quantified by qPCR analysis using two different primer sets. The primer sequences for *APP* or *BACE1* are shown in Table S3. Fold change is relative to control sgRNA. n = 3 fibroblast lines. **(C)** Higher magnification images of APP and BACE1 in SAM activated or control fibroblasts show no obvious change in protein distribution and some co-localization of APP and BACE1. Bars, 10  $\mu$ m. **(D)** Specific elevation of *APP* or *BACE1* expression by treatment of *APP* or *BACE1* sgRNA, respectively, as quantified by qPCR analysis. Each expression level was normalized by *GAPDH* expression. **(E)** No off-target elevation of the other 26 genes associated with APP/A $\beta$  processing. No significant activation relative to control sgRNA treatment was observed. Each expression level was normalized by *GAPDH* expression. The primer sequences are shown in Table S3. Fold change is relative to control sgRNA. n = 3 independent wells from HEK293T cell lines transfected with SAM plasmids.

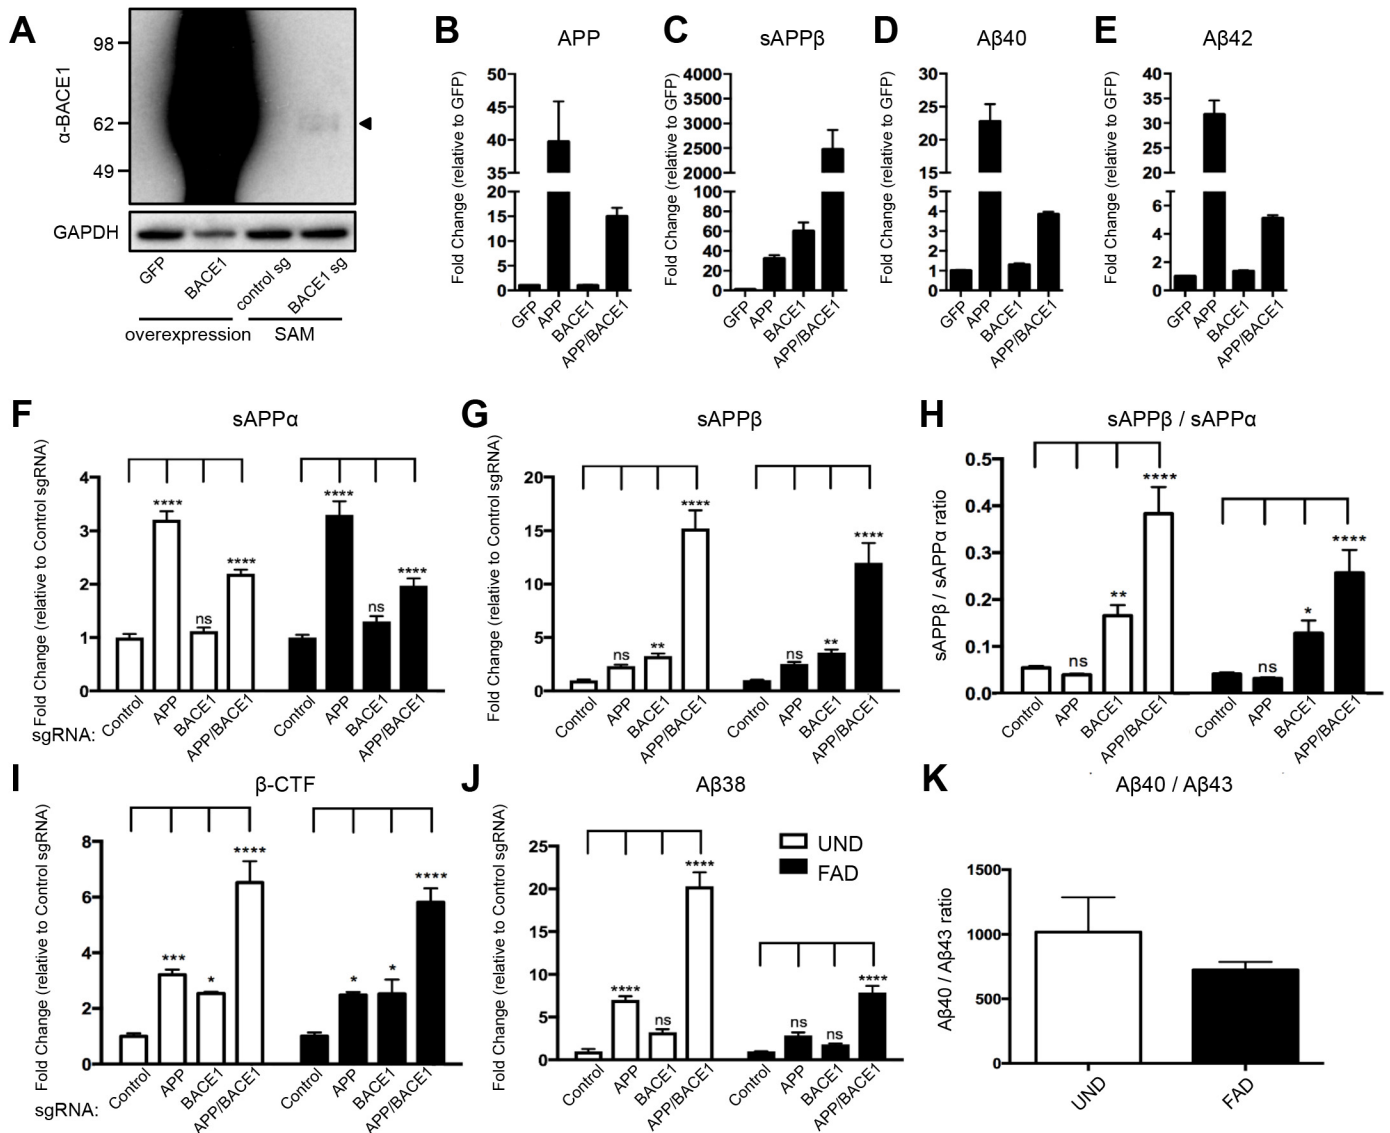

**Figure S3, Related to Figure 4: APP processing in SAM-activated fibroblasts from FAD patients.**

(A) Comparison of lentiviral overexpression and SAM activation of BACE1. Lentiviral overexpression of *BACE1* resulted in much higher levels of expression than SAM activation. BACE1 protein, arrowhead. (B-E) The levels of APP (B), sAPP $\beta$  (C), A $\beta$ 40 (D), and A $\beta$ 42 (E), as determined by ELISA, in UND fibroblast cultures with lentiviral overexpression of GFP, APP, BACE1, or APP/BACE1. Fold change is relative to GFP overexpression. (F-J) The levels of sAPP $\alpha$  (F), sAPP $\beta$  (G), the sAPP $\beta$ /sAPP $\alpha$  ratio (H),  $\beta$ -CTF (I) and A $\beta$ 38 (J) in UND and FAD fibroblasts, as determined by ELISA, in the presence of SAM activation of *APP*, *BACE1* or both together. Fold change is relative to control sgRNA (F, G, I, and J). (K) The ratio of A $\beta$ 40/A $\beta$ 43 on SAM activation with *APP* and *BACE1* in UND and FAD fibroblasts.

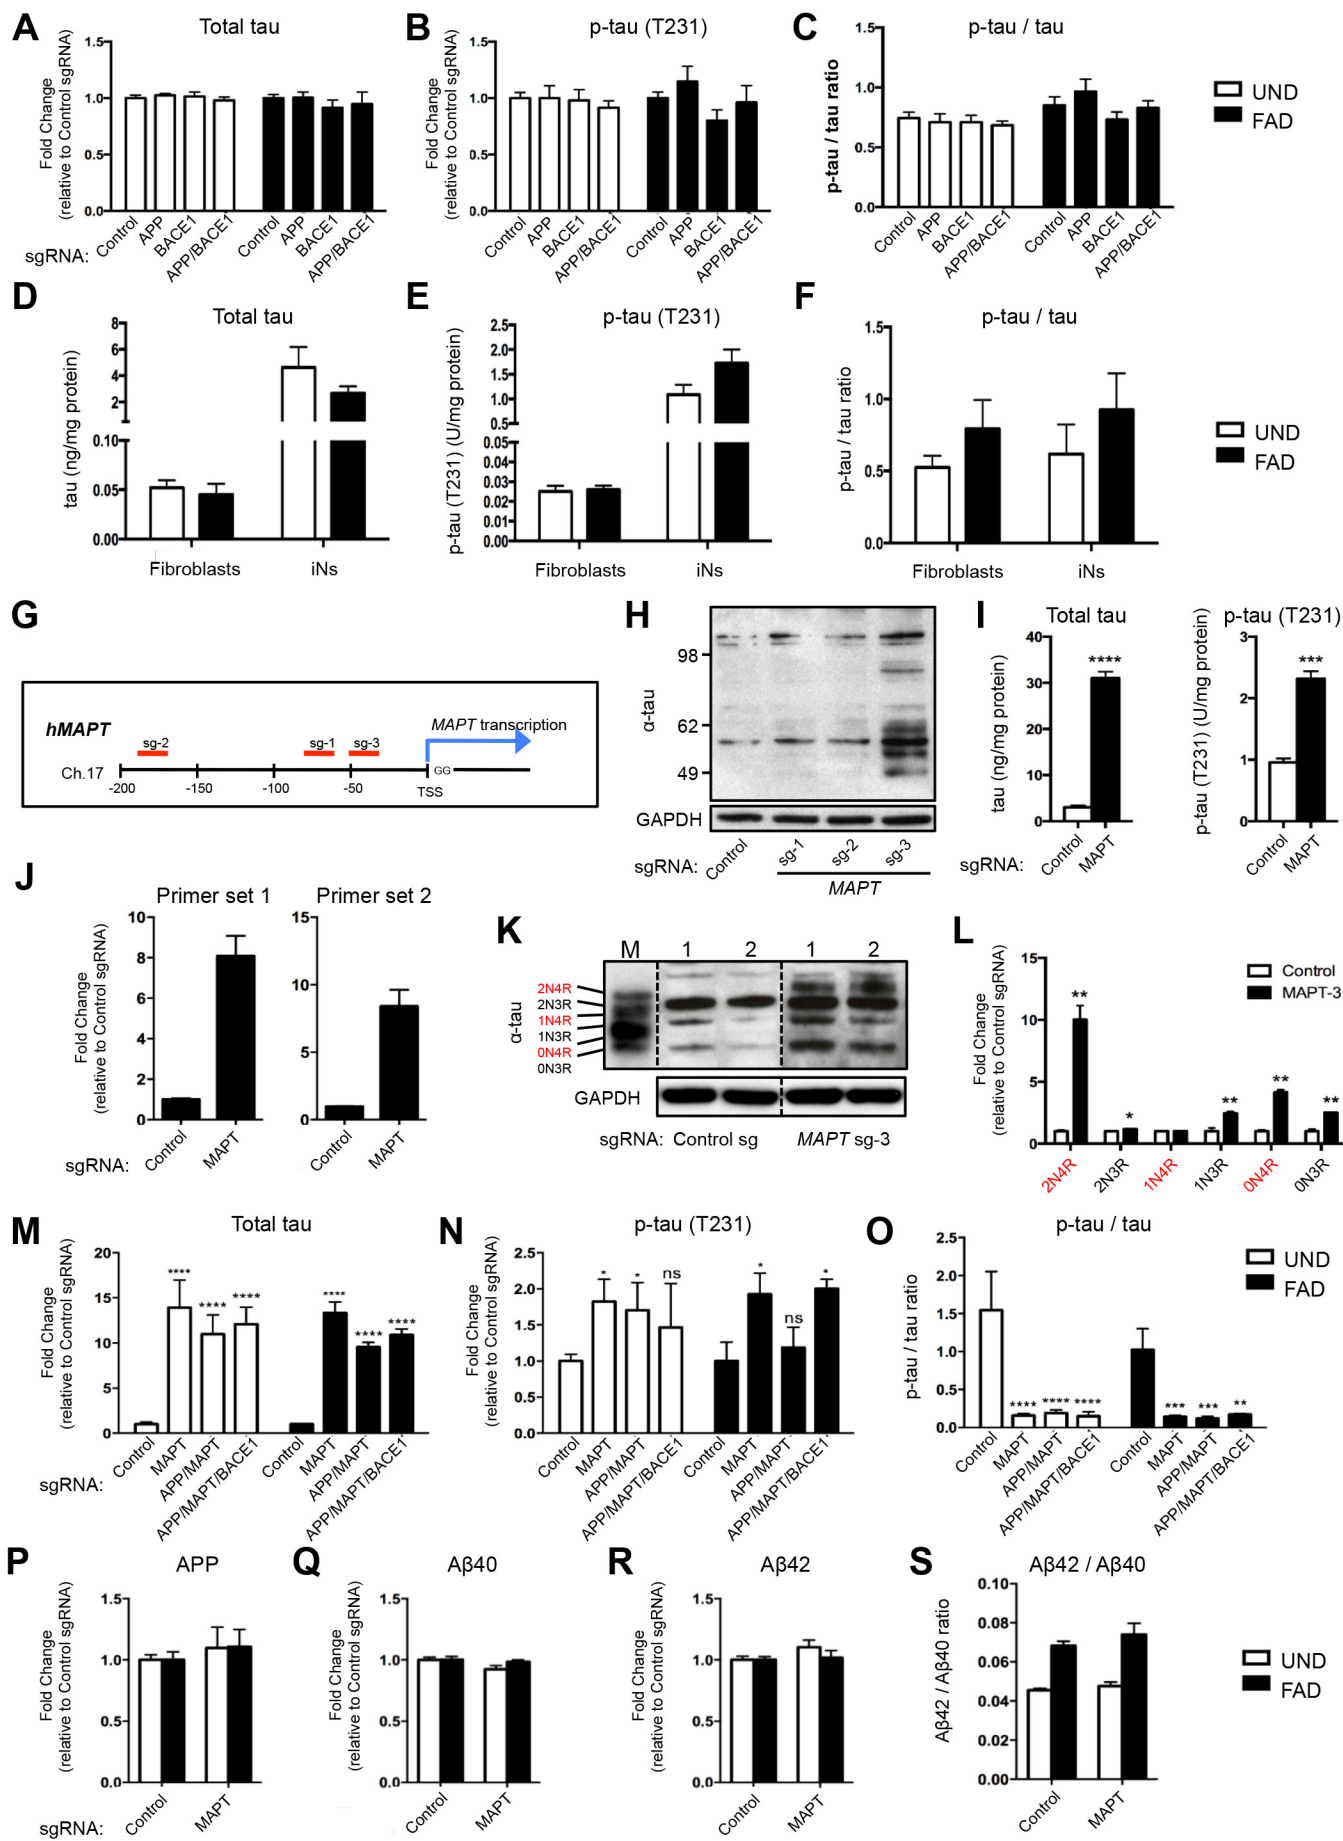

**Figure S4, Related to Figure 4: No alteration in tau accumulation by SAM-activated fibroblasts.**

(A-C) SAM activation of APP and/or BACE1 unaltered the levels of total tau (A) and p-tau (T231) (B) in UND and FAD cultures, as determined by ELISA. The ratios of p-tau/tau were unchanged in UND and FAD cultures (C). (D-F) Comparison of the levels of total tau (D) and p-tau (T231) (E), quantified by ELISA, showed a marked increase in hiNs relative to fibroblasts, but no significant differences between UND and FAD lines. The ratios of p-tau/tau were unchanged (F). (G) Design of individual sgRNAs for *MAPT*. Three sgRNAs (red) were designed within the first 200 bp upstream the TSS. (H) Screening of *MAPT* sgRNAs by Western Blotting. *MAPT* sgRNAs (sg-1 to -3) elevated endogenous tau levels relative to control sgRNA (3.6- to 19.5-fold). (I) Elevation of endogenous tau and p-tau (T231) by treatment of *MAPT* sg-3, as quantified by ELISA. n = 3 fibroblast lines. (J) Elevation of endogenous *MAPT* expression by treatment of *MAPT* sgRNA-3, as quantified by qPCR analysis using two different primer sets. The primer sequences for *MAPT* are shown in Table S3. n = 3 fibroblast lines. (K) Different tau isoforms were induced by treatment of *MAPT* sgRNA-3. Control sgRNA treatment expressed only 3R-tau isoform (0N3R, 1N3R, and 2N3R), whereas *MAPT* sgRNA-3 treatment induced 4R-tau isoforms (0N4R and 2N4R) as well as 3R-tau. (L) Quantification of tau protein isoforms by Western Blotting. n = 3 fibroblast cultures. (M-O) SAM activation of *APP*, *MAPT*, *APP/MAPT*, or *APP/BACE1/MAPT* in FAD and UND fibroblasts. Activation of *MAPT* transcription in FAD and UND fibroblasts led to a greater increase in total tau (M) than in p-tau (T231) (N), and thus the p-tau/tau ratio was decreased (O) in FAD and UND cells. n = 3 lines per group. (P-S) SAM activation of *MAPT* expression did not change the levels of APP (P), A $\beta$ 40 (Q), A $\beta$ 42 (R), and the A $\beta$ 42/A $\beta$ 40 ratio (S) relative to control sgRNA both in UND and FAD fibroblasts. n = 3 lines per group. Increased APP and APP cleavage products did not appear to modify tau accumulation, and tau accumulation did not appear to modify APP processing.

**Table S1, Related to Figures 1, 2, and 4**

List of human fibroblast lines used in this study

|     | line    | affected | gender | age   | ethnicity | mutation           | origin                   |
|-----|---------|----------|--------|-------|-----------|--------------------|--------------------------|
|     | HDFa    | no       | female | 53    | unknown   | -                  | Thermo Fisher Scientific |
|     | AG07871 | no       | female | 49    | Italian   | -                  | Coriell Institute        |
| UND | AG07926 | no       | female | adult | Italian   | -                  | Coriell Institute        |
|     | AG08125 | no       | male   | 64    | Italian   | -                  | Coriell Institute        |
| FAD | AG06840 | FAD      | male   | 56    | Canadian  | <i>PSEN1</i> A246E | Coriell Institute        |
|     | AG07768 | FAD      | female | 31    | Canadian  | <i>PSEN1</i> A246E | Coriell Institute        |
|     | AG09908 | FAD      | female | 81    | German    | <i>PSEN2</i> N141I | Coriell Institute        |

AG07768 *PSEN1* mutation was determined by sequencing analysis.

List of human fibroblast lines used in Figure 1 and 2

|                      | <i>Experiment 1</i>                    | <i>Experiment 2</i>                                |
|----------------------|----------------------------------------|----------------------------------------------------|
|                      |                                        | replication study                                  |
|                      | AG07871                                | AG07871                                            |
| UND                  | AG07926                                | AG07926                                            |
|                      | AG08125                                | HDFa                                               |
| FAD                  | AG06840                                | AG06840                                            |
|                      | AG07768                                | AG07768                                            |
|                      | AG09908                                | AG09908                                            |
| Corresponding Figure | Figure 1B-K<br>Figure 2G (Fibroblasts) | Figure 2A-F<br>Figure 2G (iNs)<br>Figure S1, S4D-F |

**Table S2, Related to Figure 3**

List of sgRNA used in initial screening

| Gene Name      | Transcript ID | sgRNA | TSS Distance | Guide RNA Sequence (5'- to -3') | WB    | qPCR |
|----------------|---------------|-------|--------------|---------------------------------|-------|------|
| <b>Control</b> | -             | -     | -            | CTGAAAAGGAAGGAGTTGA             | -     | -    |
| <b>APP</b>     | NM_001204302  | sg-1  | 120          | GGGGGCGCGTGGGGTGCAGG            | 2.3X  | 2.8X |
|                |               | sg-2  | 141          | GGCCGTCCGCCGGGAGCGG             | 1.2X  | 2.0X |
|                |               | sg-3  | 70           | CGGGGCGCGAGGGCCCTCC             | 0.8X  | 1.7X |
|                |               | sg-4  | 47           | CGCGAGCGGGCGAGTTCCC             | 1.5X  | 2.0X |
|                |               | sg-5  | 26           | AGACCCCTAGCGGCCTGCC             | 0.8X  | 2.5X |
|                |               | sg-6  | 5            | TCTCGGGTGCCGAGCGGGT             | 2.6X  | 4.2X |
|                |               | sg-7  | 92           | CCCACAGGTGCACGCGCCCT            | -     | 1.8X |
|                |               | sg-8  | 162          | ACTGTTACGAAGCCAGGT              | -     | 1.5X |
|                |               | sg-9  | 84           | AGAGGTGGGCAGGCGTTTC             | -     | 1.6X |
|                | NM_001136131  | sg-10 | 56           | CCGCATTCGTTTTTCTCT              | -     | 1.5X |
|                |               | sg-11 | 175          | ACGTTGGGGTTAAAAAATG             | -     | 1.5X |
|                |               | sg-12 | 114          | TGAGAACGAGTGAAGCTTAA            | -     | 1.3X |
|                | NM_001136016  | sg-13 | 134          | GGCTGTGGAGAAGGAACTGC            | -     | 1.4X |
|                |               | sg-14 | 92           | TTCTTTTGATGGATTTTCT             | -     | 1.5X |
|                |               | sg-15 | 113          | GGCACAAAGCCAAGTGCAG             | -     | 1.8X |
|                |               | sg-16 | 24           | GCCAACTTCTAAGCTAACA             | -     | 1.4X |
|                |               | sg-17 | 54           | AGACAGAGTTCGGAGGCTT             | -     | -    |
|                |               | sg-18 | 160          | GTC AACCTTGGATGGAATTT           | -     | 1.6X |
| <b>BACE1</b>   | NM_138971     | sg-1  | 148          | TCCGTCTGGCCCTCCCGCC             | 19.6X | -    |
|                |               | sg-2  | 73           | GGCAATCCGGCTTCCGGGGC            | 27.2X | -    |
|                |               | sg-3  | 102          | GTCTGGGATGCCCTCTGCCG            | 30.9X | -    |
| <b>MAPT</b>    | NM_005910     | sg-1  | 60           | GCGGTCAGCGCCGCGGCTG             | 4.2X  | -    |
|                |               | sg-2  | 171          | GGCCATGCGGGGTCGGGGCA            | 3.5X  | -    |
|                |               | sg-3  | 33           | GCGGGAGGGGACCGCGAAA             | 19.4X | -    |

HDFa was used in the WB and qPCR screening (WB, no replicate: qPCR, 3 technical replicates). *APP* sg-1/sg-6, *BACE1* sg-3, and *MAPT* sg-3 (shown in pink) were further validated and characterized by qPCR and ELISA using 3 independent fibroblast lines (see Figure 3D-E, 3G, S2A-B, S4I-J).

**Table S3, Related to Figure 3**

## List of primers used in the qPCR analysis for sgRNA screening

| Gene         | Primer Set 1                                    | Primer Set 2                          |
|--------------|-------------------------------------------------|---------------------------------------|
| <i>APP</i>   | forward: 5'- CAA GCA GTG CAA GAC CCA TC -3'     | 5'- GCC CTG CGG AAT TGA CAA G-3'      |
|              | reverse: 5'- AGA AGG GCA TCA CTT ACA AAC TC -3' | 5'- CCA TCT GCA TAG TCT GTG TCT G -3' |
| <i>BACE1</i> | forward: 5'- ACC AAC CTT CGT TTG CCC AA -3'     | 5'- TCT GTC GGA GGG AGC ATG AT -3'    |
|              | reverse: 5'- TCT CCT AGC CAG AAA CCA TCA G -3'  | 5'- GCA AAC GAA GGT TGG TGG T -3'     |
| <i>MAPT</i>  | forward: 5'- CCA AGT GTG GCT CAT TAG GCA -3'    | 5'- GAG TCC AGT CGA AGA TTG GGT -3'   |
|              | reverse: 5'- CCA ATC TTC GAC TGG ACT CTG T -3'  | 5'- GGC GAG TCT ACC ATG TCG ATG -3'   |
| <i>GAPDH</i> | forward: 5'- AAG GTG AAG GTC GGA GTC AAC-3'     |                                       |
|              | reverse: 5'- GGG GTC ATT GAT GGC AAC AAT A -3'  |                                       |

## List of primers used in the qPCR analysis for the off-targeting study

| Gene          | Forward primer                         | Reverse primer                         |
|---------------|----------------------------------------|----------------------------------------|
| <i>ADAM9</i>  | 5'- TCC ATT GCT CTT AGC GAC TGT -3'    | 5'- GGG GTT CAA TCC CAT AAC TCG -3'    |
| <i>ADAM10</i> | 5'- ATG GGA GGT CAG TAT GGG AAT C -3'  | 5'- ACT GCT CTT TTG GCA CGC T -3'      |
| <i>ADAM17</i> | 5'- GTG GAT GGT AAA AAC GAA AGC G -3'  | 5'- GGC TAG AAC CCT AGA GTC AGG -3'    |
| <i>ADAM19</i> | 5'- GGG AGC CTG GAT GGA CAA G -3'      | 5'- AGC TTT GAG TGG ATG CTT TTC TC -3' |
| <i>BACE1</i>  | 5'- TCT GTC GGA GGG AGC ATG AT -3'     | 5'- GCA AAC GAA GGT TGG TGG T -3'      |
| <i>BACE2</i>  | 5'- GGA GAT GCT GAT CGG GAC C -3'      | 5'- AGT ACG TGT CTA TGT AGG AGT GC -3' |
| <i>PSEN1</i>  | 5'- TGG CTA CCA TTA AGT CAG TCA GC -3' | 5'- CCC ACA GTC TCG GTA TCT TCT -3'    |
| <i>PSEN2</i>  | 5'- AGT GTG TGA TGA GCG GAC G -3'      | 5'- ACT GGG CAG TGT TCT CTC CAT -3'    |
| <i>APH1A</i>  | 5'- TTT TTC GGC TGC ACT TTC GTC -3'    | 5'- TGC GAC CAG GAT GAT AAC GC -3'     |
| <i>APH1B</i>  | 5'- CGA GCC GTT GCG TAT CAT CTT -3'    | 5'- CCA AAC AAG GGA CGA AAT CAG T -3'  |
| <i>PSENE1</i> | 5'- TCT TCT GGG TGA TAG TGC TCA -3'    | 5'- CCA GGG GTA TGG TGA AGG AGA -3'    |
| <i>NCSTN</i>  | 5'- AAT AAA ACA GCT CCC TGT GTT CG -3' | 5'- ACT ACG TGG ATA ACC CCT GTG -3'    |
| <i>APP</i>    | 5'- CAA GCA GTG CAA GAC CCA TC -3'     | 5'- AGA AGG GCA TCA CTT ACA AAC TC -3' |
| <i>APLP1</i>  | 5'- GGA CCA ATG TGA GAG TTC AAC C -3'  | 5'- GAG CCA CAG GGT AAG AGC A -3'      |
| <i>APLP2</i>  | 5'- TGA GCC TCA AAT CGC AAT GTT -3'    | 5'- CCT GTT GGA TCA GGT TCC CAT -3'    |
| <i>CDH1</i>   | 5'- CGA GAG CTA CAC GTT CAC GG -3'     | 5'- GGG TGT CGA GGG AAA AAT AGG -3'    |
| <i>CDH2</i>   | 5'- TCA GGC GTC TGT AGA GGC TT -3'     | 5'- ATG CAC ATC CTT CGA TAA GAC TG -3' |
| <i>CD44</i>   | 5'- CTG CCG CTT TGC AGG TGT A -3'      | 5'- CAT TGT GGG CAA GGT GCT ATT -3'    |
| <i>EFNB2</i>  | 5'- TAT GCA GAA CTG CGA TTT CCA A -3'  | 5'- TGG GTA TAG TAC CAG TCC TTG TC -3' |
| <i>NOTCH1</i> | 5'- TGG ACC AGA TTG GGG AGT TC -3'     | 5'- GCA CAC TCG TCT GTG TTG AC -3'     |
| <i>SORL1</i>  | 5'- CAA GGT GTA CGG ACA GGT TAG T -3'  | 5'- CCA ATG CCA GGC TAT CTC G -3'      |
| <i>ABCA7</i>  | 5'- CCC TCA ACT GGT ACG AGG CTA -3'    | 5'- AGC TTC CGG GTA AAA GGT GTA -3'    |
| <i>APOE</i>   | 5'- GTT GCT GGT CAC ATT CCT GG -3'     | 5'- GCA GGT AAT CCC AAA AGC GAC -3'    |
| <i>BIN1</i>   | 5'- TGA GCA GTG CGT CCA GAA TTT -3'    | 5'- CGA TCT TGT TTG CCT CAT CCC -3'    |
| <i>CD2AP</i>  | 5'- AAG TTG GGA CTG TTT CCC TCA -3'    | 5'- TTC TTG TCC GAA GTT TCA CAG AG -3' |
| <i>PICALM</i> | 5'- TGA CAG AGG TGA TAT ACC AGA CC -3' | 5'- TGC TTT TCC CTT TCA TCC ACT TT -3' |
| <i>RIN3</i>   | 5'- TTT CCT TCT CTG AAC GAA AGC TC -3' | 5'- ACA CAG TAG AAC GCA ATC AAT CT -3' |
| <i>SNX3</i>   | 5'- CCA AGC CGC AGA ACC TGA AT -3'     | 5'- GAC CCT GAT TTC GTA AGT GGT G -3'  |
| <i>GAPDH</i>  | 5'- GGA GCG AGA TCC CTC CAA AAT -3'    | 5'- GGC TGT TGT CAT ACT TCT CAT GG -3' |

## Supplemental Experimental Procedures

### KEY RESOURCES TABLE

| REAGENT or RESOURCE                                     | SOURCE                    | IDENTIFIER                           |
|---------------------------------------------------------|---------------------------|--------------------------------------|
| <b>Antibodies</b>                                       |                           |                                      |
| Mouse monoclonal anti-APP[22C11]                        | Millipore                 | Cat#MAB348;<br>RRID:AB_94882         |
| Rabbit polyclonal anti-BACE1                            | Abcam                     | Cat#ab10716;<br>RRID:AB_297419       |
| Mouse monoclonal anti-Tau [HT7]                         | Thermo Fisher Scientific  | Cat#MN1000;<br>RRID:AB_2314654       |
| Rabbit monoclonal anti-GAPDH [14C10]                    | Cell Signaling Technology | Cat#2118;<br>RRID:AB_561053          |
| Rabbit polyclonal anti-BACE1                            | Thermo Fisher Scientific  | Cat#PA1-757;<br>RRID:AB_325863       |
| Donkey polyclonal anti-mouse IgG (H+L), HRP-conjugated  | Jackson ImmunoResearch    | Cat#715-036-151;<br>RRID:AB_2340774  |
| Donkey polyclonal anti-rabbit IgG (H+L), HRP-conjugated | Jackson ImmunoResearch    | Cat#711-035-152;<br>RRID:AB_10015282 |
| Goat anti-rabbit IgG (H+L), Oregon Green488-conjugated  | Thermo Fisher Scientific  | Cat#O-11038;<br>RRID:AB_2539798      |
| Goat anti-mouse IgG (H+L), Alexa Fluor555-conjugated    | Thermo Fisher Scientific  | Cat#A-21422; RRID:<br>AB_2535844     |
| <b>Bacterial and Virus Strains</b>                      |                           |                                      |
| One Shot Stbl3 Chemically Competent E. coli             | Thermo Fisher Scientific  | Cat#C737303                          |
| <b>Biological Samples</b>                               |                           |                                      |
| <b>Chemicals, Peptides, and Recombinant Proteins</b>    |                           |                                      |
| poly-L-Lysine solution                                  | Travigen                  | Cat#343820001                        |
| CaCl <sub>2</sub> solution                              | Sigma-Aldrich             | Cat#21115                            |
| HEPES buffered saline, 2x concentrate                   | Sigma-Aldrich             | Cat#51558                            |
| Forskolin                                               | LC Laboratories           | Cat#F9929                            |
| D-MEM                                                   | Thermo Fisher Scientific  | Cat#11995065                         |
| Lenti-X concentrator                                    | Takara Clontech           | Cat#631232                           |
| Fetal Bovine Serum                                      | Thermo Fisher Scientific  | Cat#10082147                         |
| Penicillin and Streptomycin (10,000 U/ml)               | Thermo Fisher Scientific  | Cat#15140122                         |
| Platimun SuperFi DNA Polymerase                         | Thermo Fisher Scientific  | Cat#12351-010                        |
| 0.1% gelatin solution                                   | Millipore                 | Cat#ES006B                           |
| Doxycycline                                             | Sigma-Aldrich             | Cat#9891                             |
| D-MEM/F12 (1:1)                                         | Thermo Fisher Scientific  | Cat#10565-018                        |
| N2 supplement                                           | Thermo Fisher Scientific  | Cat#17502-048                        |
| bFGF                                                    | R&D Systems               | Cat#233-FB/CF                        |
| BDNF                                                    | R&D Systems               | Cat#248-BD/CF                        |
| GDNF                                                    | R&D Systems               | Cat#212-GD/CF                        |



|                                                          |                                |                 |
|----------------------------------------------------------|--------------------------------|-----------------|
| NT3                                                      | R&D Systems                    | Cat#267-N3/CF   |
| T4 Polynucleotide Kinase                                 | New England Biolabs            | Cat#M0201       |
| Fast Digest Esp3I (BsmBI)                                | Thermo Fisher Scientific       | Cat#FD0454      |
| T7 DNA Ligase                                            | Enzymatics                     | Cat#L6020F      |
| BSA                                                      | New England Biolabs            | Cat#B9000S      |
| Hemadimethrine bromide (polybrene)                       | Sigma-Aldrich                  | Cat#H9268       |
| RIPA buffer                                              | Thermo Fisher Scientific       | Cat#89900       |
| Protease inhibitor cocktail                              | Sigma-Aldrich                  | Cat#P8340       |
| Phosphatase inhibitor cocktail                           | Thermo Fisher Scientific       | Cat#78420       |
| NuPAGE 4-12% Bis-Tris Protein Gel                        | Thermo Fisher Scientific       | Cat#NP0322      |
| NuPAGE MES SDS Running Buffer                            | Thermo Fisher Scientific       | Cat#NP0002      |
| NuPAGE Transfer Buffer                                   | Thermo Fisher Scientific       | Cat#NP0006-1    |
| SuperSignal West Pico Chemiluminescent Substrate         | Thermo Fisher Scientific       | Cat#34080       |
| SuperSignal West Dura Chemiluminescent Substrate         | Thermo Fisher Scientific       | Cat#34076       |
| 16% paraformaldehyde solution                            | Electron microscopy Sciences   | Cat#15710       |
| Phosphate-Buffered Saline (PBS)                          | Thermo Fisher Scientific       | Cat#10010023    |
| Triton X-100                                             | Sigma-Aldrich                  | Cat#93443       |
| Normal Goat Serum                                        | Jackson ImmunoResearch         | Cat#005-000-121 |
| DAPI solution                                            | Thermo Fisher Scientific       | Cat#62248       |
| <b>Critical Commercial Assays</b>                        |                                |                 |
| RNeasy Mini Kit                                          | Qiagen                         | Cat#74104       |
| SuperScript III First-Strand Synthesis System for RT-PCR | Thermo Fisher Scientific       | Cat#18080-051   |
| pENTR/D-TOPO cloning Kit                                 | Thermo Fisher Scientific       | Cat#K240020     |
| Fast SYBR Green Cells-to-Ct Kit                          | Thermo Fisher Scientific       | Cat#4402956     |
| Power STBR Green PCR master Mix                          | Thermo Fisher Scientific       | Cat#4367659     |
| V-PLEX A $\beta$ Peptide Panel 1 (6E10) Kit              | Meso Scale Discovery           | Cat#K15200E     |
| sAPP $\alpha$ /sAPP $\beta$ Kit                          | Meso Scale Discovery           | Cat#K15120E     |
| Phospho(Thr231)/Total Tau Kit                            | Meso Scale Discovery           | Cat#K15121D     |
| APP Human ELISA Kit                                      | Thermo Fisher Scientific       | Cat#KHB0051     |
| BACE1 Assay Kit                                          | Immuno-Biological Laboratories | Cat#JP27752     |
| Human Amyloid $\beta$ (1-43) (FL) Assay Kit              | Immuno-Biological Laboratories | Cat#JP27710     |
| APP $\beta$ -CTF ELISA                                   | IBL America                    | Cat#27776       |
| Pierce BCA Protein Assay Kit                             | Thermo Fisher Scientific       | Cat#23225       |

| <b>Deposited Data</b>                                |                             |                                                                                                                     |
|------------------------------------------------------|-----------------------------|---------------------------------------------------------------------------------------------------------------------|
| <b>Experimental Models: Cell Lines</b>               |                             |                                                                                                                     |
| Human Dermal Fibroblasts, Adult (HDFa)               | Thermo Fisher Scientific    | Cat#C0135C; LOT1668134                                                                                              |
| Human Fibroblast: Female, 49-yo                      | Coriell Institute           | AG07871                                                                                                             |
| Human Fibroblast: Female, Adult                      | Coriell Institute           | AG07926                                                                                                             |
| Human Fibroblast: Male, 64-yo                        | Coriell Institute           | AG08125                                                                                                             |
| Human Fibroblast: Male, 56-yo: FAD                   | Coriell Institute           | AG06840                                                                                                             |
| Human Fibroblast: Female, 31-yo: FAD                 | Coriell Institute           | AG07768                                                                                                             |
| Human Fibroblast: Female, 81-yo: FAD                 | Coriell Institute           | AG09908                                                                                                             |
| HEK293T cell line                                    | Sigma-Aldrich               | Cat#12022001                                                                                                        |
| <b>Experimental Models: Organisms/Strains</b>        |                             |                                                                                                                     |
| <b>Oligonucleotides</b>                              |                             |                                                                                                                     |
| Primers for sgRNA plasmid construction, see Table S2 | Integrated DNA Technologies | see Table S2                                                                                                        |
| Primers for qPCR analysis, see Table S3              | Integrated DNA Technologies | see Table S3                                                                                                        |
| <b>Recombinant DNA</b>                               |                             |                                                                                                                     |
| pMD2.G                                               | Trono lab                   | Addgene #12259                                                                                                      |
| psPAX2                                               | Trono lab                   | Addgene #12260                                                                                                      |
| pTet-O-FUW-Ascl1                                     | Vierbuchen et al., 2010     | Addgene #27150                                                                                                      |
| pTet-O-FUW-Brn2                                      | Vierbuchen et al., 2010     | Addgene #27151                                                                                                      |
| pTet-O-FUW-Myt1l                                     | Vierbuchen et al., 2010     | Addgene #27152                                                                                                      |
| pTet-O-FUW-Neurod1                                   | Vierbuchen et al., 2010     | Addgene #30129                                                                                                      |
| pTet-O-FUW-EGFP                                      | Vierbuchen et al., 2010     | Addgene #30130                                                                                                      |
| FUW-M2rtTA                                           | Hockemeyer et al., 2008     | Addgene #20342                                                                                                      |
| lenti-dCas9-VP64_Blast                               | Konermann et al., 2015      | Addgene #61425                                                                                                      |
| lenti-MS2-P65-HSF1_Hygro                             | Konermann et al., 2015      | Addgene #61426                                                                                                      |
| lenti-sgRNA(MS2)_zeo backbone                        | Konermann et al., 2015      | Addgene #61427                                                                                                      |
| <b>Software and Algorithms</b>                       |                             |                                                                                                                     |
| sgRNA Design tool, Cas9 Activators with SAM          | Konermann et al., 2014      | <a href="http://sam.genome-engineering.org">http://sam.genome-engineering.org</a>                                   |
| PrimerBank, MGH-PGA                                  | Wang et al., 2012           | <a href="http://pga.mgh.harvard.edu/primerbank">http://pga.mgh.harvard.edu/primerbank</a>                           |
| GraphPad PRISM 6.0                                   | GraphPad Software           | <a href="http://www.graphpad.com/scientific-software/prism/">http://www.graphpad.com/scientific-software/prism/</a> |
| <b>Other</b>                                         |                             |                                                                                                                     |
| 0.45 µm PVDF syringe-filter                          | Millipore                   | Cat#SLHV033RS                                                                                                       |
| 24 well ibiTreat µ-Plate                             | ibidi                       | Cat#82406                                                                                                           |
| PVDF membrane                                        | Thermo Fisher Scientific    | Cat#LC2005                                                                                                          |

|                                                    |                          |             |
|----------------------------------------------------|--------------------------|-------------|
| QuantStudio 6 Flex real-time PCR system            | Thermo Fisher Scientific | equipment   |
| MicroAmp Optical 384-Well Reaction Plate           | Thermo Fisher Scientific | Cat#4309849 |
| MSD Sector Imager 2400                             | Meso Scale Discovery     | equipment   |
| UVmax plate reader                                 | Molecular Devices        | equipment   |
| Andor Revolution XDi Spinning Disk Confocal System | ANDOR                    | equipment   |

### ***Fibroblasts***

Human dermal fibroblasts from seven individuals were used in this study (Table S1). All lines were derived from de-identified, banked tissue samples. HDFa was purchased from Thermo Fisher Scientific (#C0135C, LOT1668134). The other lines were obtained from the Coriell Institute for Medical Research. Human dermal fibroblasts were maintained on 0.1% gelatin-coated dishes in D-MEM (#11995065, Thermo Fisher Scientific) containing 10% or 15% fetal bovine serum (FBS) (#10082147, Thermo Fisher Scientific) and 100 units/ml penicillin and 100 µg/ml streptomycin (#15140122, Thermo Fisher Scientific).

### ***Mutation in the PSEN1 gene***

Total RNA was extracted from human fibroblast line AG07768 by RNeasy Mini Kit (#74104, Qiagen), and the cDNA library was synthesized by random hexamers using SuperScript III First-Strand Synthesis System for RT-PCR (#18080-051, Thermo Fisher Scientific). Whole *PSEN1* sequence was amplified by Platinum SuperFi DNA Polymerase (#12351-010, Thermo Fisher Scientific) and sub-cloned into the pENTR/D-TOPO vector by directional TOPO cloning (K240020, Thermo Fisher Scientific). The point-mutation corresponding to A246E in the *PSEN1* gene was identified by Sanger sequencing analysis.

### ***Plasmids***

pMD2.G and psPAX2 were gifts from Didier Trono (Addgene plasmid #12259 and #12260, respectively). pTet-O-FUW-Ascl1, pTet-O-Brn2, pTet-O-Myt1l, pTet-O-Neurod1, pTet-O-FUW-EGFP (Addgene plasmid #27150, #27151, #27152, #30129, #30130, respectively) were gifts from Marius Wernig (Vierbuchen et al., 2010; Pang et al., 2011). FUW-M2rtTA was a gift from Rudolf Jaenisch (Addgene plasmid #20342) (Hockemeyer et al., 2008). Lenti dCas9-VP64\_Blast, lenti MS2-P65-HSF1\_Hygro, and lenti sgRNA(MS2)\_zeo backbone were gifts from Feng Zhang (Addgene plasmid #61425, #61426, and #61427, respectively) (Konermann et al., 2015). pENTR/D-TOPO (#K2400-20) and pLenti6.3/V5-DEST (#V53306) vectors were purchased from Thermo Fisher Scientific.

### ***Lentivirus production***

Lentiviral particles were produced using the calcium-phosphate transfection method. HEK293T cells (#12022001, Sigma-Aldrich) were plated onto a poly-L-Lysine (#343820001, Travigen) coated 10-cm dish at the density of  $5 \times 10^6$  cells/dish in D-MEM (#11995065, Thermo Fisher Scientific) containing 10% FBS (#10082147, Thermo Fisher Scientific). On the following day, 10 µg of lentiviral

plasmid mixture containing 4  $\mu\text{g}$  of psPAX2 (#12260, Addgene), 2  $\mu\text{g}$  of pMD2.G (#12259, Addgene), and 2  $\mu\text{g}$  of gene-specific lentiviral vector in 0.25 M  $\text{CaCl}_2$  solution (#21115, Sigma-Aldrich) were mixed with an equal volume of 2x HEPES-buffered saline (#51558, Sigma-Aldrich), and used to transfect the HEK293T cells. After 20 hours, the culture medium was replaced to 10 ml D-MEM containing 10% FBS and 10  $\mu\text{M}$  forskolin (#F9929, LC Laboratories), and incubated for another 72 hours. The culture medium was then collected and centrifuged at 2,600 rpm for 5 min to remove the cell debris. The viral supernatants were filtrated with 0.45  $\mu\text{m}$  PVDF syringe-filter (#SLHV033RS, Millipore). One-third volume (3.4 ml) of Lenti-X concentrator (#631232, Takara Clontech) was added to the viral supernatant, and incubated at 4°C for overnight. The supernatant was centrifuged at 2,600 rpm at 4°C for 45 min, and the pellet was re-suspended in 1/20x volume (500  $\mu\text{l}$ ) of D-MEM containing 10% FBS and 8  $\mu\text{g}/\text{ml}$  polybrene (#H9268, Sigma-Aldrich). Concentrated viral particles were stored at -80°C.

### ***hiN generation from human fibroblasts***

Conversion of human fibroblasts into neuronal cells was driven by forced expression of *Ascl1*, *Brn2*, *Myt1l*, and *Neurod1* according to a prior publication with minor modifications (Vierbuchen et al., 2010; Pang et al., 2011). Briefly, human fibroblasts were plated onto a 0.1% gelatin-coated dish at the density of  $0.7 \times 10^4$  cells/cm<sup>2</sup> in D-MEM containing 10% FBS. On the next day (Day-0), concentrated lentivirus particles including pTet-O-FUW-*Ascl1*, pTet-O-*Brn2*, pTet-O-*Myt1l*, pTet-O-*Neurod1*, pTet-O-FUW-EGFP (#27150, #27151, #27152, #30129, #30130 Addgene) and FUW-M2rtTA (#20342, Addgene) were directly applied into the fibroblast culture medium and incubated for 24 hours (Hockemeyer et al., 2008). The medium was subsequently replaced to fresh D-MEM containing 10% FBS and 8  $\mu\text{g}/\text{ml}$  doxycycline (#9891, Sigma-Aldrich) (Day-1). At Day-2, the medium was replaced to fresh D-MEM/F12 (1:1) media containing N2 supplement (#10565-018, 17502-048, Life Technologies), 10 ng/ml basic fibroblast growth factor (bFGF: #233-FB/CF, R&D Systems) and 8  $\mu\text{g}/\text{ml}$  doxycycline. At Day-12, the medium was replaced to fresh D-MEM/F12 (1:1) media containing N2 supplement (#10565-018, 17502-048, Life Technologies), 10 ng/ml BDNF, GDNF, and NT3 (#248-BD/CF, #212-GD/CF, #267-N3/CF, R&D Systems) and 8  $\mu\text{g}/\text{ml}$  doxycycline. Half volume of culture medium was changed every 2 to 3 days.

### ***Western Blotting analysis***

Cells were harvested in RIPA buffer (#89900, Thermo Fisher Scientific) containing protease inhibitor cocktail (#P8340, Sigma-Aldrich) and phosphatase inhibitor cocktail (#78420, Thermo Fisher Scientific), sonicated for a few seconds on ice, and centrifuged at 15,000 rpm at 4°C for 30 min. Ten  $\mu\text{g}$  of protein lysates were subjected to SDS-PAGE using NuPAGE 4-12% Bis-Tris Protein Gel (#NP0322, Thermo Fisher Scientific) in NuPAGE MES SDS Running Buffer (#NP0002, Thermo Fisher Scientific) at 200 volts for 52 min and transferred to a

0.45 µm pore-size PVDF membrane (#LC2005, Thermo Fisher Scientific) in NuPAGE Transfer Buffer (#NP0006-1, Thermo Fisher Scientific) at 30 Volts for 65 min. Blots were incubated with blocking buffer (20 mM Tris, 137 mM NaCl, [pH7.6], 0.1% Tween 20, 5% non-fat skim milk) at room temperature for 60 min and probed with the primary antibody diluted in blocking buffer at 4°C overnight. The primary antibodies used were: anti-GAPDH [14C10] (#2118, Cell Signaling Technology), anti-APP [22C11] (#MAB348, Millipore), anti-BACE1 (#ab10716, Abcam), and anti-tau [HT7] (#MN1000, Thermo Fisher Scientific). For APP CTF detection, 10 µg of protein lysates were subjected to SDS-PAGE using Novex 10-20% Tricine Protein Gel (#EC6625BOX, Thermo Fisher Scientific) in Novex Tricine SDS Running Buffer (#LC1675, Thermo Fisher Scientific) at 125 volts for 2 hrs and transferred to a 0.2 µm pore-size nitrocellulose membrane (#LC2000, Thermo Fisher Scientific) in Novex Tris-Glycine Transfer Buffer (#LC3675, Thermo Fisher Scientific) at 25 Volts for 60 min. The primary antibody used was: anti-APP C-Terminal Fragment (#802801, BioLegend). Blots were incubated with the appropriate HRP-conjugated secondary antibodies (#715-036-151, #711-036-152, Jackson ImmunoResearch) diluted in blocking buffer at room temperature for 60 min, and visualized using the SuperSignal West Pico Chemiluminescent Substrate (#34080, Thermo Fisher Scientific) or SuperSignal West Dura Chemiluminescent Substrate (#34076, Thermo Fisher Scientific).

#### ***Gene expression analysis by quantitative real-time PCR (qPCR)***

RNA extractions and reverse transcriptions to cDNA for quantitative gene expression analyses in fibroblasts or HEK293T cells were performed using the Fast or Power SYBR<sup>®</sup> Green Cells-to-C<sub>T</sub><sup>™</sup> Kit (#4402956, #4402955, Thermo Fisher Scientific) according to the manufacturer's protocol. Real-time PCR analysis of 2 ~ 8 µl of cDNA products were performed in triplicates and probed with two different primer pairs (250 nM final concentration) for each transcript of interest with Power SYBR<sup>®</sup> Green PCR Master Mix (#4367659, Thermo Fisher Scientific). The primer sequences for the individual genes were obtained from the PrimerBank (<https://pga.mgh.harvard.edu/primerbank>) (Wang et al., 2012) and are listed in Table S3. Samples were applied in MicroAmp<sup>®</sup> Optical 384-Well Reaction Plates (#4309849, Thermo Fisher Scientific) and analysed in a QuantStudio<sup>™</sup> 6 Flex real-time PCR system (Thermo Fisher Scientific). Relative expression levels were normalized to the housekeeping gene *GAPDH* and calculated using the comparative C<sub>T</sub> method.

#### ***Immunofluorescence analysis***

Cells were fixed with 4% paraformaldehyde (PFA) (#15710, Electron Microscopy Sciences) in phosphate-buffered saline (PBS) at room temperature for 10 min and subsequently washed with 10 mM Tris-HCl (pH 7.4) saline buffer. Cells were then permeabilized and blocked in PBS with 0.1 % Triton-X100 and 3 % normal goat serum (NGS) for 10 min. Primary antibodies were diluted in PBS supplemented with 1 % NGS and added to the cells for an overnight incubation at 4°C. Cells were subsequently washed and incubated with the secondary

antibodies for 1h at room temperature. The primary antibodies used in the study were: anti-APP [22C11] (#MAB348, Millipore) and anti-BACE1 (#PA1-757, Thermo Fisher Scientific). The secondary antibodies used in the study were: Oregon Green 488-conjugated goat anti-rabbit IgG (H+L) antibody (#O-11038, Thermo Fisher Scientific) and Alexa Fluor 555-conjugated goat anti-mouse IgG (H+L) antibody (#A-21422, Thermo Fisher Scientific). Cell nucleus was counter-stained with DAPI solution (#62248, Thermo Fisher Scientific). Images were acquired using an Andor Revolution XDi Spinning Disk Confocal System. Total brightness of APP or BACE1 was quantified as the signal subtracted background fluorescence and doubly normalized to the cell number and control sgRNA.

### **Statistical Analysis**

Statistical analyses were performed using the GraphPad PRISM 6.0 software. Values are expressed as means  $\pm$  SEM. Statistical differences were tested using unpaired t tests for two samples and a two-way ANOVA combined with Turkey's post-hoc test for multiple samples. Experiments were conducted with a minimum of 3 independent cell cultures from different individuals per UND and FAD group. Statistical differences are indicated by *p*-values of \*  $p < 0.05$ , \*\*  $p < 0.01$ , \*\*\*  $p < 0.001$ , and \*\*\*\*  $p < 0.0001$ .

### **Supplemental References**

- Hockemeyer D, Soldner F, Cook EG, Gao Q, Mitalipova M, Jaenisch R (2008) A drug-inducible system for direct reprogramming of human somatic cells to pluripotency. *Cell stem cell* 3:346-353.
- Konermann S, Brigham MD, Trevino AE, Joung J, Abudayyeh OO, Barcena C, Hsu PD, Habib N, Gootenberg JS, Nishimasu H, Nureki O, Zhang F (2015) Genome-scale transcriptional activation by an engineered CRISPR-Cas9 complex. *Nature* 517:583-588.
- Pang ZP, Yang N, Vierbuchen T, Ostermeier A, Fuentes DR, Yang TQ, Citri A, Sebastiano V, Marro S, Sudhof TC, Wernig M (2011) Induction of human neuronal cells by defined transcription factors. *Nature* 476:220-223.
- Vierbuchen T, Ostermeier A, Pang ZP, Kokubu Y, Sudhof TC, Wernig M (2010) Direct conversion of fibroblasts to functional neurons by defined factors. *Nature* 463:1035-1041.
- Wang X, Spandidos A, Wang H, Seed B (2012) PrimerBank: a PCR primer database for quantitative gene expression analysis, 2012 update. *Nucleic acids research* 40:D1144-1149.
